# Supplementary material for: Two-year epidemiology of post-COVID-19 conditions in Bangladesh: a cohort study of post-COVID-19 from 12,925 SARS-CoV-2 cases between July and December 2021–2023 in Bangladesh
Source: PubMed Central journal article supplement — Arch Public Health. 2024 Sep 4;82:148. doi: 10.1186/s13690-024-01358-6 (PMC11373300; doi:10.1186/s13690-024-01358-6), 2024-09-04
Supplement: 13690_2024_1358_MOESM1_ESM.pdf [file 13690_2024_1358_MOESM1_ESM.pdf]

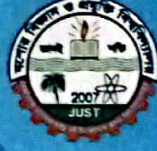

Memo No: MB/2023/78

Date: October 01, 2023

### GRANT APPROVAL LETTER

Altaf Hossain Sarker  
PhD Student  
Department of Microbiology  
Jashore University of Science and Technology  
Jashore-7408, Bangladesh.

I am pleased to inform you that the academic committee recently voted for a grant to your doctoral study of BDT 552449.00 (USD 5000), that to be released in three fiscal years (July 2022-July 2024). The purpose of this grant is to assist in the data collection and intervention provision for the doctoral project titled "Comparing the Efficacy of Physiotherapy versus drug management on fatigue, Physical functioning, and Episodic Disability for Myalgic Encephalomyelitis in Post-COVID-19 Condition".

In all public acknowledgments, we prefer that you indicated this grant as being received from the University Grants Commission of Bangladesh through Jashore University of Science & Technology. The recipients must adhere to the existing taxation policy of the Government of the People's Republic of Bangladesh.

We ask that you acknowledge receipt of this grant and indicate your acceptance of the terms discussed above. The grant was approved on July 21, 2023. The grant number is 23-FoBST-06, please provide this number during acknowledgment and funding information in your reports and publications. You also have to submit a detailed yearly report within December to the Department of Microbiology regarding your research project progression, in terms of receiving the yearly allocated budget.

In the meantime, you have our very best wishes for continued success.

Sincerely,

Professor Dr. Iqbal Kabir Jahid  
Chairman, Department of Microbiology  
Dean, Faculty of Biological Science & Technology  
Jashore University of Science and Technology  
Jashore-7408  
Contact no. 0242142038  
E-mail: [ikjaahidmb@just.edu.bd](mailto:ikjaahidmb@just.edu.bd) & [mb.office@just.edu.bd](mailto:mb.office@just.edu.bd)
