# Supplementary material for: Two-year epidemiology of post-COVID-19 conditions in Bangladesh: a cohort study of post-COVID-19 from 12,925 SARS-CoV-2 cases between July and December 2021–2023 in Bangladesh
Source: PubMed Central journal article supplement — Arch Public Health. 2024 Sep 4;82:148. doi: 10.1186/s13690-024-01358-6 (PMC11373300; doi:10.1186/s13690-024-01358-6), 2024-09-04
Supplement: 13690_2024_1358_MOESM2_ESM.pdf [file 13690_2024_1358_MOESM2_ESM.pdf]

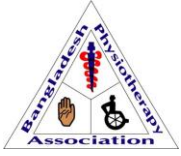

# Institute of Physiotherapy, Rehabilitation & Research (IPRR)

(The Academic institute of Bangladesh Physiotherapy Association)

Permanent office: CRP-Savar, Dhaka-1343, Bangladesh

Cell: +88 01789 982 544 mail: info@bpa-bd.org website: www.bpa-bd.org

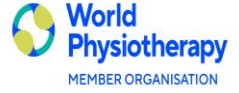

BPA-IPRR/IRB/19/01/2023/69

13 February, 2023

Altaf Hossain Sarker  
PhD Student  
Department of Microbiology  
Jashore University of Science and Technology  
Jashore-7408, Bangladesh.

Ref: Study title “**Comparing Effectiveness of Physiotherapy versus Drug Management on Fatigue, Physical Functioning, and Episodic Disability for Myalgic Encephalomyelitis in Post-COVID-19 Condition**”

Subject: Approval of documents for the study title “**Comparing Effectiveness of Physiotherapy versus Drug Management on Fatigue, Physical Functioning, and Episodic Disability for Myalgic Encephalomyelitis in Post-COVID-19 Condition**” by the ethics committee.

Dear Altaf Hossain Sarker,

The Institutional Review Board (IRB) of Institute of Physiotherapy Rehabilitation and Research (the academic institute of BPA) has reviewed and discussed your application to conduct the research entitled on “**Comparing Effectiveness of Physiotherapy versus Drug Management on Fatigue, Physical Functioning, and Episodic Disability for Myalgic Encephalomyelitis in Post-COVID-19 Condition**” on February 11, 2023.

The following documents have been reviewed and approved:

| SL No | Documents                        | Version | Dated      | Copy |
|-------|----------------------------------|---------|------------|------|
| 01    | Dissertation Proposal            | 1       | 14.01.2023 | 1    |
| 02    | Questionnaire (English version)  | 1       | 14.01.2023 | 1    |
| 03    | Information sheet & consent form | 1       | 14.01.2023 | 1    |

The following members of the ethics committee reviewed the protocol on December 16, 2021

| SL No | Name                           | Role in the review board | Affiliation with the institute (Yes/No)<br>If yes, please mention |
|-------|--------------------------------|--------------------------|-------------------------------------------------------------------|
| 1     | Professor Md. Obaidul Haque    | Chair of BPA IPRR IRB    | Yes, Vice-Principal, BHPI                                         |
| 2     | Sanjit Kumar Chakraborty       | Member                   | Yes, Clinician, SP Hospital                                       |
| 3     | Ehsanur Rahman                 | Member                   | Yes, Academician, BHPI                                            |
| 4     | Dr. Nasirul Islam, Ph. D.      | Member                   | Yes, Editorial board member, BPJ                                  |
| 5     | [Not willing to disclose name] | Member                   | No, Faculty, DCPT                                                 |



## Institute of Physiotherapy, Rehabilitation & Research (IPRR)

(The Academic institute of Bangladesh Physiotherapy Association)

Permanent office: CRP-Savar, Dhaka-1343, Bangladesh

Cell: +88 01789 982 544 mail: info@bpa-bd.org website: www.bpa-bd.org

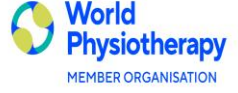

We confirm that neither you nor your study team members participated in the deliberations of the ethics committee & did not vote on the proposal for this study.

### **We approved the research to be conducted in its presented form.**

The institutional ethics committee expects to be informed about the progress of the study, any serious adverse effects (SAE) occurring in the course of the study, any changes in the protocol and participant's information/ informed consent and asks to be provided a copy of the final record.

Please submit to the Ethical Committee (EC) the published article of the study as per EC standard operating protocols.

The EC is organized and operates according to the requirements of declaration of the Helsinki and ICH-GCP, local regulatory requirements and guidelines.

Yours sincerely,

Ibrahim Khalil Nayem

Office Executive, BPA and Member Secretary, BPA- IPRR IRB
